# Supplementary material for: Antibacterial activity of a berberine nanoformulation
Source: publisher site journal article supplement (doi:10.3762/bjnano.13.56), 2022-07-11
Supplement: Additional file 1 [file 2190-4286-13-56-S1.pdf]

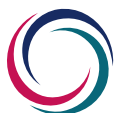

## Supporting Information

for

### **Antibacterial activity of a berberine nanoformulation**

Hue Thi Nguyen, Tuyet Nhung Pham, Anh-Tuan Le, Nguyen Thanh Thuy,  
Tran Quang Huy and Thuy Thi Thu Nguyen

*Beilstein J. Nanotechnol.* **2022**, *13*, 641–652. [doi:10.3762/bjnano.13.56](https://doi.org/10.3762/bjnano.13.56)

### **Raw DLS data**

# Size Distribution Report by Intensity

v2.1

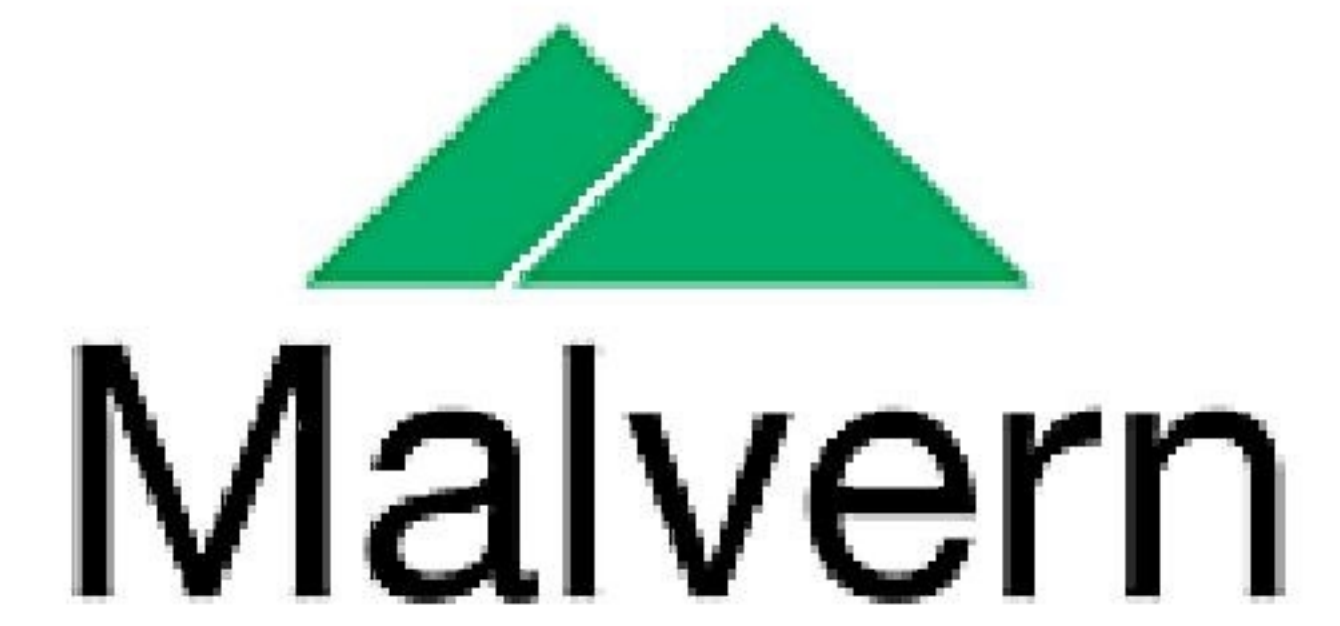

## Sample Details

Sample Name: Mau 2 1

SOP Name: Size.sop

General Notes:

|                           |                                                           |
|---------------------------|-----------------------------------------------------------|
| File Name: 17621.dts      | Dispersant Name: Water                                    |
| Record Number: 11         | Dispersant RI: 1.330                                      |
| Material RI: 1.00         | Viscosity (mPa.s): 0.8872                                 |
| Material Absorbtion: 0.00 | Measurement Date and Time: Thursday, June 17, 2021 5:2... |

## System

|                                                   |                                 |
|---------------------------------------------------|---------------------------------|
| Temperature (°C): 25.0                            | Duration Used (s): 60           |
| Count Rate (kcps): 257.1                          | Measurement Position (mm): 3.00 |
| Cell Description: Disposable micro cuvette (40µl) | Attenuator: 11                  |

## Results

|                                | Size (d.nm):         | % Intensity | Width (d.nm): |
|--------------------------------|----------------------|-------------|---------------|
| <b>Z-Average (d.nm):</b> 530.6 | <b>Peak 1:</b> 156.0 | 100.0       | 16.91         |
| <b>Pdl:</b> 0.555              | <b>Peak 2:</b> 0.000 | 0.0         | 0.000         |
| <b>Intercept:</b> 0.737        | <b>Peak 3:</b> 0.000 | 0.0         | 0.000         |

Result quality : **Refer to quality report**

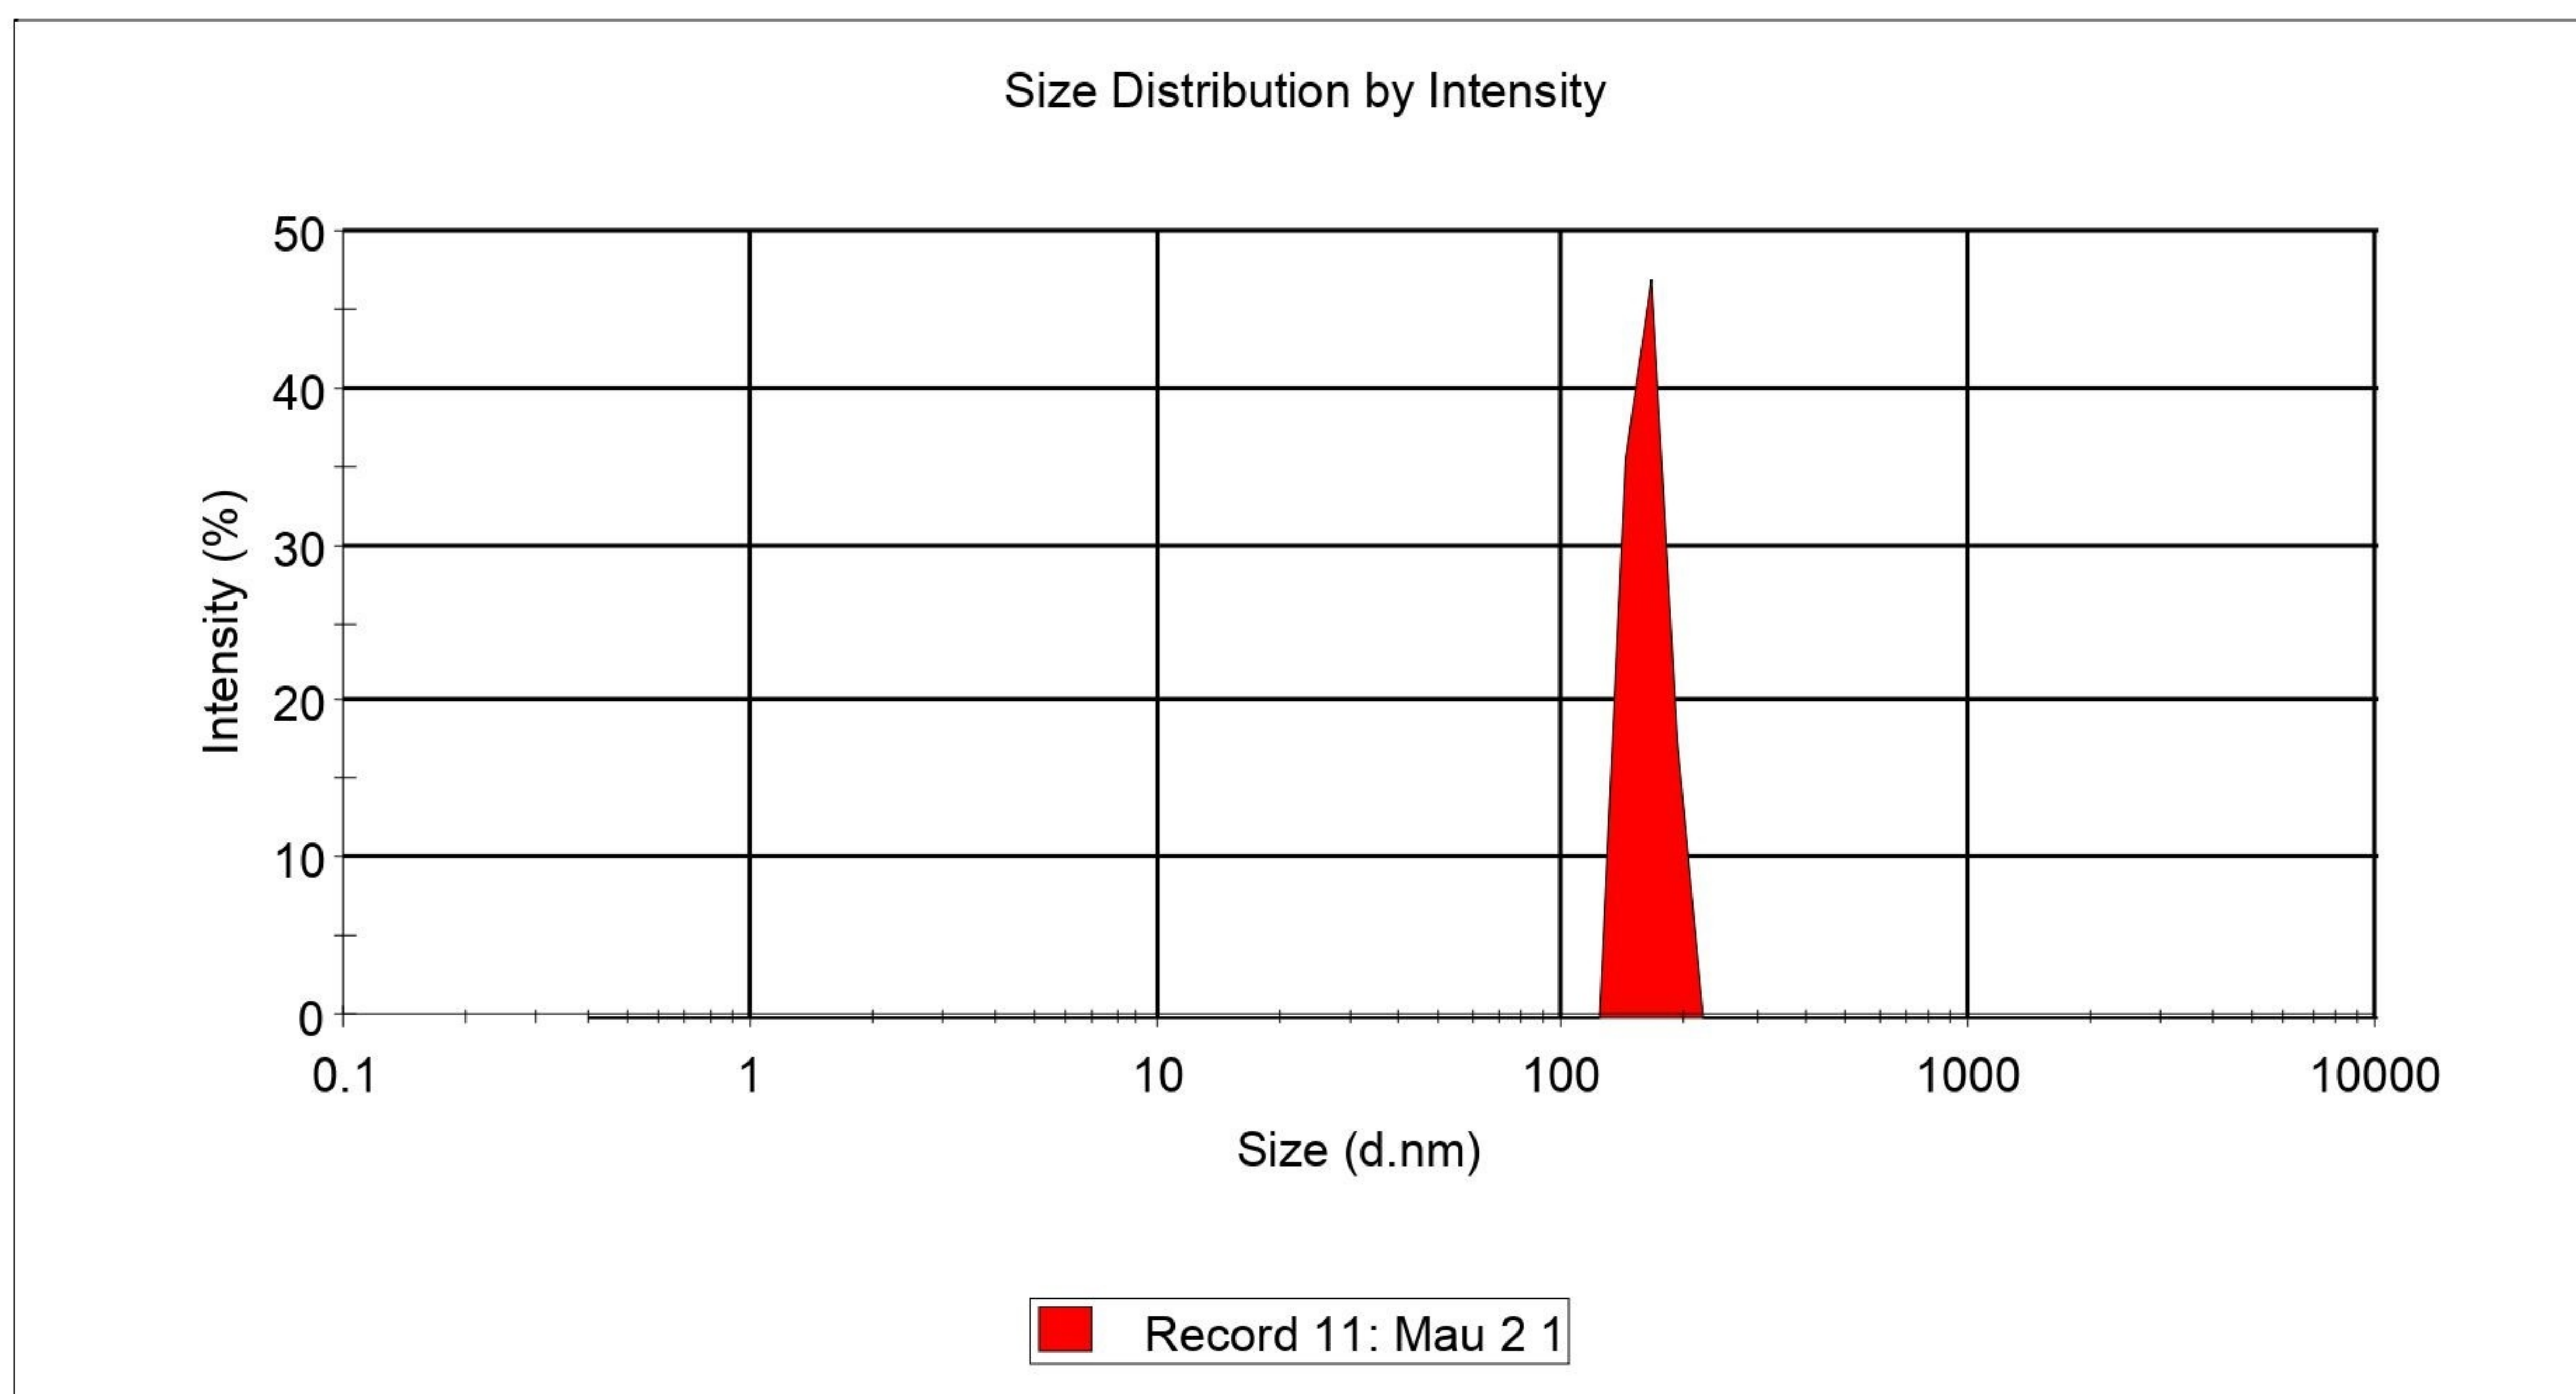

Record 11: Mau 2 1
